1 Predictors of COVID-19 Vaccine Acceptability Among Refugees and Other Migrant Populations:  
2 A Systematic Scoping Review

3 Yasaman Yazdani<sup>1</sup>, Poojitha Pai<sup>1</sup>, Shahab Sayfi<sup>1,2,3</sup>, Arash Mohammadi<sup>1</sup>, Saber Perdes<sup>4</sup>, Denise Spitzer<sup>5</sup>,  
4 Gabriel E. Fabreau<sup>6</sup>, Kevin Pottie<sup>1</sup>

5 1. Department of Family Medicine, Epidemiology and Biostatistics, Western University, London, Ontario,  
6 Canada

7 2. Department of Biology, Faculty of Science, University of Ottawa, Ottawa, Canada

8 3. Michael G. DeGroot Cochrane Canada and GRADE Centres, Department of Health Research Methods,  
9 Evidence and Impact, McMaster University, Hamilton, Ontario, Canada

10 4. Nezarat Consulting Ltd, Ottawa, Ontario, Canada

11 5. School of Public Health, University of Alberta, Edmonton, Alberta, Canada

12 6. Departments of Medicine and Community Health Sciences, University of Calgary, Calgary, Alberta,  
13 Canada

14 **Abstract**

15 **Objective.** This study aimed to map the existing literature to identify predictors of COVID-19 vaccine  
16 acceptability among refugees, immigrants, and other migrant populations.

17 **Methods.** A systematic search of Medline, Embase, APA PsycInfo and Cumulative Index of Nursing and  
18 Allied Health Literature (CINAHL) was conducted up to 31 January 2023 to identify the relevant English  
19 peer-reviewed observational studies. Two independent reviewers screened, selected studies, and extracted  
20 data.

21 **Results.** We identified 34 cross-sectional studies, primarily conducted in high income countries (76%).  
22 Lower vaccine acceptance was associated with mistrust in the host countries' government and healthcare  
23 system, concerns about the safety and effectiveness of COVID-19 vaccines, limited knowledge of  
24 COVID-19 infection and vaccines, lower COVID-19 risk perception, and lower integration level in the

25 host country. Female gender, younger age, lower education level, and being single were associated with  
26 lower vaccine acceptance in most studies. Additionally, sources of information about COVID-19 and  
27 vaccines and previous history of COVID-19 infection, also influence vaccine acceptance. Vaccine  
28 acceptability towards COVID-19 booster doses and various vaccine brands were not adequately studied.

29 **Conclusions.** Vaccine hesitancy and lack of trust in COVID-19 vaccines became significant public health  
30 concerns within migrant populations. These findings may help in providing information for current and  
31 future vaccine outreach strategies among migrant populations.

32 **Keywords: COVID-19, Immigrants, Migrants, Refugees, Vaccine acceptance, Vaccine hesitancy,**  
33 **Vaccine recommendations**

#### 34 **Introduction**

35 The COVID-19 pandemic poses a significant threat to public health, not only in terms of its impact on  
36 mortality and morbidity, but also due to the social and economic disruptions it has caused, as well as the  
37 burden of public health restrictions (1). To combat this, one of the most crucial strategies is widespread  
38 vaccination among the population (2).

39 In addition to barriers to equitable access to COVID-19 vaccines, vaccine hesitancy compounds the  
40 challenges faced, increasing the difficulties to achieve widespread vaccination coverage. Vaccine  
41 hesitancy is defined as the delay or refusal of vaccination despite its availability, by the WHO Strategic  
42 Advisory Group of Experts on Immunization (SAGE) working group on vaccine hesitancy (3).

43 Understanding the factors that contribute to vaccine hesitancy is a complex and context-specific task. For  
44 COVID-19 vaccines, skepticism has arisen due to the novelty of the disease and concerns about their  
45 safety and efficacy. These concerns have been amplified by the prevalence of false or misleading  
46 information, or misinformation, leading to what the WHO has labeled an "infodemic" (4).

47 Previous research indicates that certain populations, including Refugee, Immigrant, and Migrant (RIM)  
48 populations, are at higher risk of vaccine hesitancy (5). While there is limited research on the  
49 determinants of vaccine hesitancy in these groups, studies have shown that lack of accessibility, mistrust  
50 stemming from culturally insensitive healthcare practices, and discrimination experienced when seeking  
51 care are common reasons (6). Furthermore, RIM populations face elevated risks of COVID-19 exposure  
52 due to their overrepresentation in high-risk occupations, crowded living conditions, social deprivation,  
53 and barriers to accessing reliable information on preventive measures (7). Identifying predictors of  
54 COVID-19 vaccine acceptance in RIM populations could inform strategies to overcome potential  
55 obstacles and ensure effective vaccination campaigns.

## 56 **Research Objectives**

57 We conducted a systematic scoping review using an existing conceptual framework to map the English  
58 literature on COVID-19 vaccine acceptability predictors among RIM populations, and to identify the  
59 current gaps in the literature.

## 60 **Materials and methods**

61 In this review, we applied the enhanced version of the Joanna Briggs Institute (JBI) scoping review  
62 guidance (8).

## 63 **Ethics statement**

64 N/A

## 65 **Eligibility criteria**

66 The International Organization for Migration (IOM) defines a migrant as “A person who moves away  
67 from his or her place of usual residence” (9). Our study focused on predictors of COVID-19 vaccine  
68 acceptability among international migrants. A list of the relevant terms is available in Table 1.

69

70

71 **Table 1. Population, concept, and context (PCC) and relevant keywords**

| <b>PCC elements:</b>                                       | <b>Search terms</b>                                                                                                                                                                                                                                                                                                                                                                                                                                              | <b>Search results</b> |
|------------------------------------------------------------|------------------------------------------------------------------------------------------------------------------------------------------------------------------------------------------------------------------------------------------------------------------------------------------------------------------------------------------------------------------------------------------------------------------------------------------------------------------|-----------------------|
| <b>Population (Refugees and other migrant populations)</b> | Immigrant, migrant, emigrant, refugee, asylum seeker, diaspora, newcomer, foreigner, foreign-born, foreign worker                                                                                                                                                                                                                                                                                                                                                | 750                   |
| <b>Concept (vaccine acceptability)</b>                     | Immunization, vaccine, vaccination, vaccine hesitancy, vaccination hesitancy, vaccine refusal, anti-vaccine, hesitancy, hesitation, trust, acceptance, refusal, willingness, attitude, choice, denial, phobia, avoidance, decision, uptake, doubt, resistance, reluctance, exemption, controversy, dilemma, intention, skeptic, delay, distrust, mistrust, confidence, acceptability, perception, concern, fear, belief, dropout, rejection, behavior, knowledge |                       |
| <b>Context (COVID-19 pandemic and vaccination)</b>         | Covid-19, severe acute respiratory syndrome coronavirus 2, Coronavirus, Sars-cov-2                                                                                                                                                                                                                                                                                                                                                                               |                       |

72 We conducted a comprehensive review of all observational, peer-reviewed studies published in English  
73 up until January 31, 2023, as it aligns with the scope of our research question. Studies focusing on  
74 predictors of COVID-19 vaccine acceptability and similar concepts among RIM were included. We also  
75 included general population studies, if more than 50% of their participants were immigrants or refugees,  
76 or a separate sub-group analysis of RIM were reported.

77 Reviews, experimental and qualitative studies, editorials, and commentaries were excluded. However, the  
78 references of relevant reviews were screened in order to find any eligible original research articles.

## 79 **Search methods**

80 Keywords, and index terms suggested by refugee and immigrant health professionals and the Western  
81 University research librarian, helped us develop a comprehensive search strategy for the targeted  
82 databases. We searched the following databases, without any search restrictions: Medline, Embase, APA  
83 PsycInfo and Cumulative Index of Nursing and Allied Health Literature (CINAHL). We also searched the  
84 World Health Organization (WHO), The United Nations High Commissioner for Refugees (UNHCR) and  
85 the International Organization for Migration (IOM) websites for relevant information. Our full Medline  
86 search strategy is presented in appendix 1.

## 87 **Screening and selection**

88 Following the search, all identified publications were collated and uploaded on COVIDENCE (a web-  
89 based platform that manages systematic review data) to review and remove duplicates. All the stages of  
90 screening were done separately by two reviewers. Any conflicts between primary reviewers were resolved  
91 through discussion and getting the opinion of a third senior reviewer.

## 92 **Data Extraction and Management**

93 Two reviewers extracted and charted the data, using a data extraction tool based on a previously reported  
94 conceptual framework (Appendix 2) (10).

## 95 **Synthesis of the results**

96 Finally, we presented the results according to the Preferred Reporting Items for Systematic reviews and  
97 Meta-Analyses extension for Scoping Reviews (PRISMA-ScR) Checklist in tabular form, accompanied  
98 by a narrative summary. As a scoping review, our study aimed to provide an overview of the existing  
99 literature rather than assessing the quality of included studies.

## 100 **Results**

101 Using the above-mentioned search criterion, the databases yielded 1635 total articles. No further relevant  
102 studies were found on WHO, IOM or UNHCR websites. The details of the study selection process are  
103 shown in Figure 1.

104 **Fig 1. Selection of included studies (PRISMA Flow diagram)**

105 **Characteristics of included studies**

106 Thirty-four observational studies were found to meet the inclusion criteria. We present a descriptive  
107 analysis of the studies included in Table 2. Most studies were conducted nationally (89%), in high income  
108 countries (76%). Forty-eight percent of all migrant participants were female and 52% were male. Eight  
109 (24%) and two (6%) articles studied refugees and undocumented migrants respectively, while only one  
110 (3%) focused on international students exclusively. Only two studies (6%) examined migrants' hesitancy  
111 towards getting COVID-19 booster dose and three (9%) evaluated participants' preferences regarding  
112 different vaccine brands offered or their country of origin. Ninety percent of studies were conducted after  
113 the first WHO recommendation regarding COVID-19 vaccination, released in December 2020.

114 **Table 2. Characteristics of included studies**

| <b>Study characteristics</b> | <b>Study attributes</b> | <b>Number of studies (%)</b><br><b>N=34</b> | <b>Study ID</b>                                 |
|------------------------------|-------------------------|---------------------------------------------|-------------------------------------------------|
| <b>Host country</b>          | <b>High income</b>      | 26 (76%)                                    | 12-14,17-24,26-28,30,32,33,35-37,40-42,50,55,63 |
|                              | <b>Middle income</b>    | 7 (21%)                                     | 15,16,25,34,36,38,39                            |
|                              | <b>Low income</b>       | 1 (3%)                                      | 31                                              |
|                              | <b>USA</b>              | 11 (32%)                                    | 17,20,22,24,28,30,32,41,50,55,63                |
|                              | <b>Germany</b>          | 3 (9%)                                      | 13,18,40                                        |
|                              | <b>South Korea</b>      | 2 (6%)                                      | 12,35                                           |

|                                          |                                    |             |                                              |
|------------------------------------------|------------------------------------|-------------|----------------------------------------------|
|                                          | <b>Australia</b>                   | 2(6%)       | 23,26                                        |
|                                          | <b>Qatar</b>                       | 3 (9%)      | 14,19,21                                     |
|                                          | <b>Thailand</b>                    | 2 (6%)      | 25,34                                        |
|                                          | <b>Lebanon</b>                     | 2 (6%)      | 16,38                                        |
|                                          | <b>other</b>                       | 10 (29%)    | 26,27,29-31,33,36,37,39,42                   |
| <b>Geographical coverage</b>             | <b>National</b>                    | 30 (89%)    | 12-28,31,33-35,37-42,50,55,63                |
|                                          | <b>International</b>               | 4 (11%)     | 29,30,32,36                                  |
| <b>Study design</b>                      | <b>Cross sectional</b>             | 34 (100%)   | 12-42,50,55,63                               |
|                                          | <b>Mixed method</b>                | 2 (6%)      | 41,55                                        |
| <b>Sampling techniques</b>               | <b>Convenience sampling</b>        | 12 (35%)    | 14,16,21,23,25,26,35,37,39-41,50             |
|                                          | <b>Snowball sampling</b>           | 4 (12%)     | 12,13,20,22                                  |
|                                          | <b>Probability sampling</b>        | 6 (18%)     | 17,19,27,28,34,42                            |
|                                          | <b>Not mentioned</b>               | 12 (35%)    | 15,18,24,29-33,36,38,55,63                   |
| <b>Sample size</b>                       | <b>Range</b>                       | (127-7821)  |                                              |
|                                          | <b>Less than 500</b>               | 17 (50%)    | 13,15,19,20,22,23,28,32,35,36,39-42,50,55,63 |
|                                          | <b>500-1000</b>                    | 6 (18%)     | 12,19,25,26,30,37                            |
|                                          | <b>More than 1000</b>              | 11 (32%)    | 14,16-18,21,24,27,29,31,33,38                |
| <b>Gender</b>                            | <b>Male</b>                        | 20412(52%)  |                                              |
|                                          | <b>Female</b>                      | 18630 (48%) |                                              |
| <b>Other demographic characteristics</b> | <b>Racialized status/ethnicity</b> | 11 (32%)    | 12,14,17,19,20,24,32,35,41,50,63             |
|                                          | <b>Immigration status</b>          | 16 (47%)    | 15,19,22,24,28,30-32,34,36,38-42,63          |
|                                          | <b>Region of origin</b>            | 19 (56%)    | 13,16,18,22-25,28-30,34,36,38-42,50,55       |
| <b>Target population</b>                 | <b>Refugees</b>                    | 8 (24%)     | 15,16,22,26,31,38,39,41                      |
|                                          | <b>Undocumented migrants</b>       | 2 (6%)      | 30,32                                        |

|                         |                                                               |          |                                           |
|-------------------------|---------------------------------------------------------------|----------|-------------------------------------------|
|                         | <b>Migrant workers</b>                                        | 2 (6%)   | 34,36                                     |
|                         | <b>International students</b>                                 | 1 (3%)   | 42                                        |
|                         | <b>Any type of migratory background/status</b>                | 9 (26%)  | 12,21,23,28,29,33,35,40,50,55             |
|                         | <b>Migrants as a subgroup of general population</b>           | 16 (47%) | 13-21,24,25,27,29,31,37,63                |
| <b>Timeline</b>         | <b>Before WHO first COVID-19 vaccination recommendation</b>   | 4 (12%)  | 14,21,27,50                               |
|                         | <b>After WHO first COVID-19 vaccination recommendation</b>    | 30 (88%) | 12,13,15-20,22-26,28-42,55,63             |
| <b>Vaccine outcomes</b> | <b>Vaccine acceptance</b>                                     | 9 (26%)  | 12,20,22,25,34,35,37,39,42                |
|                         | <b>Vaccine hesitancy</b>                                      | 11 (32%) | 15,17,19,21,24,26,27,29-31,36             |
|                         | <b>Vaccine intention</b>                                      | 14 (42%) | 13,14,16,18,22,23,28,32,33,38,41,50,55,63 |
|                         | <b>Hesitancy towards booster dose</b>                         | 2 (6%)   | 23,24                                     |
|                         | <b>Acceptability based on vaccine brand/country of origin</b> | 3 (9%)   | 16,25,39                                  |

115

116 Table 3 shows the variables examined in the included studies; however, only some studies investigated  
 117 the association of these factors with vaccine acceptance/intention/hesitancy (Table 4). According to the  
 118 literature review and based on the conceptual framework used (10), we categorized predictors of COVID-  
 119 19 vaccine hesitancy into four major groups.

120 -Sociodemographic factors

121 -Communication-related factors



122 -COVID-19 vaccine- related factors

123 -Covid-19 infection related factors

124 **Table 3. Factors examined in included studies**

| <b>Study factors</b>                                                    | <b>Number (%)</b><br><b>N=34</b> | <b>Study ID</b>                                    |
|-------------------------------------------------------------------------|----------------------------------|----------------------------------------------------|
| <b>Demographics</b>                                                     | 34 (100%)                        | 12-42,50,55,63                                     |
| <b>Trust in authorities</b>                                             | 17 (50%)                         | 12-14,16-18,20,23-26,28,31,34,36-38                |
| <b>Sources of news/information</b>                                      | 19 (56%)                         | 12-16,18,21,23-26,30,31,34,36,39,41,50,55          |
| <b>COVID-19 Vaccine acceptance/intention proportion</b>                 | 32 (94%)                         | 12-29,31-36,38-42,50,55,63                         |
| <b>Knowledge/attitude/ beliefs towards Covid-19 vaccine</b>             | 26 (76%)                         | 12-17,19,20,22-28,31,33,35-40,42,55,63             |
| <b>Concern about COVID-19 vaccine safety/side effects</b>               | 25 (74%)                         | 12-17,19,20,22-28,33,35-40,42,55,63                |
| <b>Concern about COVID-19 vaccine efficacy</b>                          | 17 (50%)                         | 12,14-16,22-26,33,37-40,42,55,63                   |
| <b>Concern about COVID-19 vaccine development</b>                       | 7 (21%)                          | 13,14,16,17,20,38,39                               |
| <b>Knowledge/attitude/behavior regarding COVID-19 disease</b>           | 20 (59%)                         | 13,14,16-19,22,23,25,26,29,31,34,36,38-40,42,50,63 |
| <b>COVID-19 risk perception</b>                                         | 15 (44%)                         | 13,14,16-19,22,23,25,26,34,36,38,40,63             |
| <b>History/ exposure to covid-19 in participants or their relations</b> | 16 (47%)                         | 13,15,17,19,20,22,24,25,27,28,30,31,33,34,36,39    |

125

126

127 **Table 4. COVID-19 vaccine acceptance associated factors (n= number of studies examined the**  
 128 **association between vaccine acceptance and each factor)**

| Study factors                             |                                                     | Number of studies reported significant association (%) | Study ID                            |
|-------------------------------------------|-----------------------------------------------------|--------------------------------------------------------|-------------------------------------|
| <b>Sociodemographic factors</b>           | <b>Age (n=28)</b>                                   | 15 (54%)                                               | 13-17,23-31,50,63                   |
|                                           | <b>Gender (n=27)</b>                                | 12 (44%)                                               | 12-22,32                            |
|                                           | <b>Education (n=23)</b>                             | 13 (57%)                                               | 12,13,15,17,18,20,21,23,27,31-33,55 |
|                                           | <b>Marital status (n=13)</b>                        | 4 (31%)                                                | 12,14,27,35                         |
| <b>Communication-related factors</b>      | <b>Trust in authorities (n=8)</b>                   | 5 (63%)                                                | 17,21,23,26,37                      |
|                                           | <b>Sources of news/information (n=12)</b>           | 7 (58%)                                                | 12,18,26,30,31,41,50                |
| <b>COVID-19 Vaccine-related factors</b>   | <b>Perceived vaccine safety/side effects (n=12)</b> | 10 (83%)                                               | 14,19,22-25,36,39,40                |
|                                           | <b>Perceived vaccine efficacy (n=9)</b>             | 8 (89%)                                                | 14,22-24,38-40,42                   |
|                                           | <b>Concerned about vaccine development (n=3)</b>    | 3 (100%)                                               | 14,17,39                            |
| <b>Covid-19 infection-related factors</b> | <b>COVID-19 risk perception (n=10)</b>              | 9 (90%)                                                | 16,18,19,22,23,26,34,36,40          |

|  |                                                                                |         |          |
|--|--------------------------------------------------------------------------------|---------|----------|
|  | <b>History/ exposure to covid-19 in participants or their relations (n=11)</b> | 3 (27%) | 17,20,36 |
|--|--------------------------------------------------------------------------------|---------|----------|

129

### 130 **Sociodemographic factors**

131 Most common sociodemographic factors associated with COVID-19 acceptance were gender, age, level  
132 of education, and marital status (Table 4). Female gender (11-21), younger age (14, 15, 17, 22-29), lower  
133 level of education (12, 16, 17, 19, 20, 22, 26, 30-32), and being single (11, 13, 26) were associated with  
134 lower vaccine acceptance in most studies.

135 Some of the other sociodemographic influencers of COVID-19 vaccine acceptance were sexual  
136 orientation (19), income (26, 33), region of origin (11, 17, 21), religion (11, 17), migratory background  
137 (20, 30, 34, 35), employment status (13, 20, 26), years living in host countries (22, 27, 32, 35, 36),  
138 racialized status (16, 31), working in health care settings (19, 24, 28), language fluency (27, 35), having  
139 comorbidities (29), and having insurance (31). In two studies, refugees living outside the refugee camps  
140 were less likely to accept COVID-19 vaccination (30, 37). Additionally, one study examined the  
141 relationship between different personality traits and COVID-19 vaccine hesitancy. In this study higher  
142 Conscientiousness, lower Openness and Neuroticism were associated with lower vaccine acceptance(20).

### 143 **Communication-related factors**

144 Among the studies that examined the association between trust in authorities and COVID-19 vaccine  
145 acceptance, five studies (63%) found a positive association between level of trust in government and host  
146 country's health care system and COVID-19 vaccine acceptance. Moreover, participants' preference to  
147 get vaccinated against COVID-19 was significantly associated with their source of COVID-19  
148 information in 58% of studies examining this association (table 4). Also, participants who had more

149 exposure to confidence-inducing news and had no exposure to concerning news regarding COVID-19  
150 vaccines were more likely to get the booster dose (22).

### 151 **COVID-19 Vaccine-related factors**

152 Concerns regarding the safety/side effects of COVID-19 vaccine was a prominent factor associated with  
153 lower vaccine acceptability in 10 studies (83%) evaluating this association. Perceived vaccine efficacy  
154 was also another predictor of vaccine acceptability. Eight articles (89%) reported lower acceptance among  
155 participants who had mistrust in COVID-19 vaccines' effectiveness. Another reason for lower vaccine  
156 acceptance was the belief that COVID-19 vaccines were developed too quickly and that the rushed pace  
157 of testing them would become problematic in the future. Being concerned about vaccine development was  
158 positively associated with vaccine hesitancy in all three studies evaluating this association. Additionally,  
159 six studies examined the participants' knowledge/attitude scores towards COVID-19 vaccines (15, 22, 24,  
160 34, 36, 38). Two studies showed that people with greater knowledge of COVID-19 vaccines had higher  
161 intention to get vaccinated (15, 22). Non-COVID vaccine refusal and negative attitude towards vaccines  
162 in general were associated with lower COVID-19 vaccine acceptance (11, 29, 39) . Also, getting the  
163 seasonal flu vaccination (13, 38) were a positive predictor of vaccine acceptance.

### 164 **COVID-19 infection-related factors**

165 Among studies that examined the association of COVID-19 risk perception and vaccine acceptability,  
166 nine (90%) found a positive association; whereby, participants who had higher COVID-19 risk perception  
167 had higher vaccine acceptability. Only three out of the 11 studies that evaluated the relationship between  
168 COVID-19 vaccine acceptance and previous history of exposure/infection with COVID-19 disease  
169 reported a significant association. In the study by Frisco et al. previous infection with COVID-19 was  
170 associated with higher vaccine acceptance (16), while Ogunbajo et al. suggested that previous positive  
171 COVID-19 test was higher among vaccine hesitant participants (19). Moreover, West et al. found that  
172 vaccine acceptance was higher among workers who had more COVID-19 exposure through crowded

173 housing (35). Also, Rego et. al did not find any association between knowing someone with COVID-19  
174 infection and vaccine acceptance (30). Four studies examined the association of vaccine acceptability  
175 with knowledge and attitudes regarding COVID-19 infection. All reported that higher COVID-19  
176 infection knowledge and attitude scores were associated with higher vaccine acceptability (13, 24, 33,  
177 38). Participants' health behaviors during COVID-19 pandemic were other factors measured in some  
178 studies. They found wearing a face mask and social distancing were associated with higher COVID-19  
179 vaccine acceptance/intention (24, 30, 33).

### 180 **Other factors associated with COVID-19 vaccine hesitancy**

181 Fear of needles (21, 39), belief in house remedies (39), religious reasons (23, 33, 39), belief in natural  
182 exposure to germs and viruses as the best protection and “not to mess up with nature” (13, 39) were other  
183 reasons for lower vaccine acceptance as reported by vaccine hesitant or anti vaccine individuals.

184 Shaw et al. reported that individuals with high vaccine acceptability had a lower social vulnerability  
185 index(40). Another study by page et al. showed that higher immigration enforcement exposure, such as  
186 experiencing or knowing someone who experienced immigration raids, detention or deportation, was  
187 associated with lower odds of COVID-19 vaccine acceptance (29). In contrast, acculturation and social  
188 integration of migrants were associated with higher vaccine acceptance (32, 36), as well as cues to action  
189 (15, 41) and social norms (15). Cues to action, refers to being motivated to get vaccinated by seeing  
190 neighbors, community leaders, doctors, or politicians receive the vaccine; whereas vaccination as a social  
191 norm refers to the higher likelihood of getting vaccinated when most people an individual knew had  
192 received the vaccine.

### 193 **Discussion**

194 Our findings suggest that predictors of COVID-19 vaccine acceptance among migrant populations can be  
195 categorized in four major groups: “sociodemographic factors”, “communication-related factors”,  
196 “COVID-19 vaccine-related factors” and “COVID-19 infection- related factors”. Lower vaccine

197 acceptance was associated with mistrust in the host countries' government and healthcare system,  
198 concerns about the safety and effectiveness of COVID-19 vaccines, limited knowledge of COVID-19  
199 infection and vaccines, lower COVID-19 risk perception, and lower integration level in the host country.  
200 Also, female gender, younger age, lower education level, and being single were sociodemographic factors  
201 associated with lower vaccine acceptance in most studies. Sources of information regarding COVID-19  
202 and vaccines and previous history of COVID-19 infection were other influencers of vaccine acceptance.  
203 A systematic review on qualitative studies on COVID-19 vaccine hesitancy among ethnic minorities  
204 similarly identified five major themes for drivers of vaccine hesitancy among these populations: 1)  
205 Institutional mistrust, 2) Lack of confidence in vaccine and development process, 3) Lack of reliable  
206 information or messengers, 4) Complacency/perceived lack of need and 5) Structural barriers to vaccine  
207 (42).

208 While our findings show that most studies reported lower vaccine acceptance among immigrant women,  
209 as the association between sex/gender and COVID-19 vaccine acceptance among RIM was significant in  
210 only 44% of studies examining this association, further analytic investigation is needed on this matter. In  
211 a meta-analysis conducted by Alimoradi et al. the pooled prevalence of Covid-19 vaccine acceptance did  
212 not significantly differ according to gender in migrants and ethnic minorities (43). Another systematic  
213 review on determinants of routine and COVID-19 vaccine uptake among RIM also reported no strong  
214 association with gender (44). Higher skepticism among females might be even more important to achieve  
215 higher vaccination coverage, as this can directly affect children COVID-19 vaccination rate, because  
216 mothers appear less willing to vaccinate their children against COVID-19 than fathers (45, 46).

217 Understanding the sociodemographic predictors of vaccine acceptability can help to improve community  
218 engagement strategies to increase vaccination uptake in populations with lower vaccine acceptance, such  
219 as outreach initiatives for under-immunized ethnic groups. One example is a successful program  
220 addressed low vaccination rates among women of Rohingya refugees in Cox's Bazar, Bangladesh.  
221 Strategies included educational programs, women-only radio clubs, religious group-study sessions, and

222 employing female vaccinators. These measures improved access to accurate information and created a  
223 comfortable environment for refugee women to get vaccinated (47).

224 Other sociodemographic factors of potentially great importance among migrant populations include  
225 migration status, years living in the host country, region of origin, language fluency, religion, and  
226 immigration enforcement exposure (11, 17, 21, 27, 32, 34, 48). Evidence suggests that language barriers  
227 and cultural variations are prominent factors that can affect these populations' intention to be immunized  
228 (11).

229 The term "vaccine hesitancy" might imprecisely blame individuals, while there are several fundamental  
230 factors that may lead to making this decision (49). Our findings corroborate previous research that  
231 suggests trust in the host country's government and public health authorities are key factors that affect  
232 migrants' attitude towards COVID-19 vaccines and vaccination decision making (22, 30, 36, 49, 50).

233 Lack of trust among migrant communities can stem from previous experience of xenophobia, racial  
234 discrimination, and anti-migrant politics (50, 51). A qualitative systematic review of COVID-19 vaccine  
235 hesitancy by Shearn et al. showed that "feeling unheard, ignored or excluded from the healthcare system"  
236 caused institutional mistrust resulting in COVID-19 vaccine hesitancy among RIM populations (42).

237 Moreover, trust also plays a crucial role in acceptance of non-COVID vaccines among RIM population  
238 (50).

239 Previous research also suggests that source of information is an important influencer of vaccination  
240 decision making (52); however, this factor might be more complicated among RIM populations based on  
241 different cultural and linguistic backgrounds and adaptation level within host countries. Moreover, the  
242 lack of adequate information in migrants' primary languages often lead to reliance on community  
243 networks, traditional and social media, which might lead to confusion and inability to discern factual  
244 information from misinformation (25, 29, 53). Similarly, in non-COVID vaccination context, the  
245 overwhelming amount of contradictory information and false claims spread through social media  
246 regarding vaccines undermines the efforts to encourage vaccine acceptance among migrants (50).

247 A systematic review by Romate et al. suggest that the perceived safety and effectiveness of COVID-19  
248 vaccines as well as risk perception of COVID-19 infection is associated with both “knowledge” and  
249 “trust” factors (54). Additionally, our study revealed that increased knowledge level about both COVID-  
250 19 infection and vaccines among migrants were associated with higher vaccine acceptability. These  
251 findings reinforce previous research that investigated these associations among general populations (55,  
252 56). Applying various community engagement strategies may help build trust and address knowledge  
253 gaps and misinformation among these diverse communities (57). Previous research suggests “using high-  
254 touch rather than high-tech approaches” and community health workers' involvement help provide  
255 trustworthy sources of information and tailoring new health recommendations (49).

256 Finally, our study suggests that higher levels of migrants' acculturation and integration in the host country  
257 is associated with higher COVID-19 vaccine acceptance (32, 35, 36). Previous research similarly showed  
258 that migrants living in societies with lower integration policies for migrant populations, experience poorer  
259 health conditions (32, 58, 59) Strategies that facilitate migrants' psychological, social, economic,  
260 political, navigational, and linguistic integration in a host country can, in turn affect other vaccine  
261 hesitancy related factors such as trust in authorities and misinformation (32).

### 262 **Implication for public health Policy**

263 Our findings may help inform the programs and community outreach strategies to improve uptake of  
264 COVID-19 vaccines in migrant and refugee subgroups with lower vaccine acceptance. Reducing mistrust  
265 in authorities and addressing knowledge gaps among migrant populations is crucial for improving  
266 COVID-19 vaccine acceptance and similar public health challenges.

### 267 **Limitations**

268 It is noteworthy that we noticed some limitations in the included studies. Due to the cross-sectional design  
269 of included studies, we cannot make causal claims. Most studies used non-random sampling strategies,  
270 which meant that participants might not have been good representatives of migrant populations. Further,



271 using online platforms to recruit study participants and survey in English or the host country's language,  
272 can skew the data towards more acculturated, connected, and less vulnerable study participants.  
273 Moreover, most studies did not consider potential confounding variables such as having comorbidities,  
274 health literacy, duration of residence in host country in their analyses. Finally, recall bias, selection bias,  
275 and social desirability bias were other issues which might have affected the included studies' findings.

## 276 **Future studies**

277 Evaluation of migrant population's attitude towards the COVID-19 booster dose(s) and different types  
278 and brands of COVID-19 vaccines would be beneficial. Undertaking a systematic review with an equity  
279 lens might be helpful to better identify subpopulations of migrants with suboptimal vaccination uptake.

## 280 **Conclusion**

281 The acceptability of COVID-19 vaccines among RIM is influenced by various factors, including  
282 sociodemographic characteristics, communication-related factors, COVID-19 vaccine-related factors, and  
283 COVID-19 infection-related factors. Targeted vaccination plans, community engagement strategies, and  
284 efforts to address knowledge gaps and build trust are crucial for promoting vaccine acceptance among  
285 RIM populations.

## 286 **Acknowledgment**

287 This research was funded by the Canadian Institutes of Health Research (CIHR).

288 All authors were actively involved in discussing and refining the research questions. Kevin Pottie  
289 provided expertise in designing research objectives, defining the inclusion and exclusion criteria and  
290 search strategy as well as manuscript revision. Gabriel Fabreau and Denise Spitzer contributed to  
291 formulating the research objectives and editing the manuscript, ensuring its quality and accuracy  
292 throughout the process. Yasaman Yazdani and Poojitha Pai contributed to defining the search strategy,  
293 conducting the literature search, and screening articles for inclusion, data extraction, synthesizing the

294 findings, and drafting sections of the report. Shahab Sayfi contributed to the screening process and  
295 interpretation of the results. Arash Mohammadi and Saber Perdes contributed to manuscript revision. All  
296 authors reviewed and approved the final manuscript for publication.

297 The authors have no conflicts of interest to declare.

298 We would like to thank Ms. Roxanne Isard, research and scholarly communication librarian at Western  
299 University, for her helpful guidance in developing this study's search strategy.

300

## 301 **References**

- 302 1. Fink G, Tediosi F, Felder S. Burden of COVID-19 restrictions: National, regional and global  
303 estimates. *EClinicalMedicine*. 2022;45:101305.
- 304 2. Eyre DW, Taylor D, Purver M, Chapman D, Fowler T, Pouwels KB, et al. Effect of Covid-  
305 19 vaccination on transmission of alpha and delta variants. *New England Journal of Medicine*.  
306 2022.
- 307 3. MacDonald NE. Vaccine hesitancy: Definition, scope and determinants. *Vaccine*.  
308 2015;33(34):4161-4.
- 309 4. World Health Organization = Organisation mondiale de la S. Infodemic management: a  
310 key component of the COVID-19 global response – Parer aux infodémies: un élément essentiel  
311 de la riposte mondiale à la COVID-19. *Weekly Epidemiological Record = Relevé épidémiologique*  
312 *hebdomadaire*. 2020;95(16):145-8.
- 313 5. Mipatrini D, Stefanelli P, Severoni S, Rezza G. Vaccinations in migrants and refugees: a  
314 challenge for European health systems. A systematic review of current scientific evidence.  
315 *Pathogens and global health*. 2017;111(2):59-68.
- 316 6. Edge S, Newbold B. Discrimination and the health of immigrants and refugees: exploring  
317 Canada's evidence base and directions for future research in newcomer receiving countries.  
318 *Journal of immigrant and minority health*. 2013;15:141-8.
- 319 7. Jaljaa A, Caminada S, Tosti ME, D'Angelo F, Angelozzi A, Isonne C, et al. Risk of SARS-  
320 CoV-2 infection in migrants and ethnic minorities compared with the general population in the  
321 European WHO region during the first year of the pandemic: a systematic review. *BMC Public*  
322 *Health*. 2022;22(1):143.
- 323 8. Peters MD, Godfrey CM, Khalil H, McInerney P, Parker D, Soares CB. Guidance for  
324 conducting systematic scoping reviews. *JBHI Evidence Implementation*. 2015;13(3):141-6.
- 325 9. Migration IO. IOM Definition of "Migrant" [Available from: [https://www.iom.int/about-](https://www.iom.int/about-migration)  
326 [migration](https://www.iom.int/about-migration)].
- 327 10. Joshi A, Kaur M, Kaur R, Grover A, Nash D, El-Mohandes A. Predictors of COVID-19  
328 vaccine acceptance, intention, and hesitancy: a scoping review. *Frontiers in public health*.  
329 2021;9:698111.
- 330 11. Achangwa C, Lee T-J, Lee M-S. Acceptance of the COVID-19 vaccine by foreigners in  
331 South Korea. *International Journal of Environmental Research and Public Health*.  
332 2021;18(22):12035.

- 333 12. Aktürk Z, Linde K, Hapfelmeier A, Kunisch R, Schneider A. COVID-19 vaccine hesitancy  
334 in people with migratory backgrounds: A cross-sectional study among Turkish-and German-  
335 speaking citizens in Munich. *BMC Infectious Diseases*. 2021;21(1):1-12.
- 336 13. Alabdulla M, Reagu SM, Al-Khal A, Elzain M, Jones RM. COVID-19 vaccine hesitancy  
337 and attitudes in Qatar: A national cross-sectional survey of a migrant-majority population.  
338 *Influenza and other respiratory viruses*. 2021;15(3):361-70.
- 339 14. Al-Hatamleh MA, Hatmal MmM, Mustafa SH, Alzu'bi M, AISou'b AF, Abughanam SN, et  
340 al. Experiences and perceptions of COVID-19 infection and vaccination among Palestinian  
341 refugees in Jerash camp and Jordanian citizens: a comparative cross-sectional study by face-to-  
342 face interviews. *Infectious Diseases of Poverty*. 2022;11(1):1-20.
- 343 15. Ali Z, Perera SM, Garbern SC, Diwan EA, Othman A, Ali J, et al. Variations in COVID-19  
344 Vaccine Attitudes and Acceptance among Refugees and Lebanese Nationals Pre-and Post-  
345 Vaccine Rollout in Lebanon. *Vaccines*. 2022;10(9):1533.
- 346 16. Frisco ML, Van Hook J, Thomas KJ. Racial/ethnic and nativity disparities in US Covid-19  
347 vaccination hesitancy during vaccine rollout and factors that explain them. *Social Science &*  
348 *Medicine*. 2022;307:115183.
- 349 17. Holz M, Mayerl J, Andersen H, Maskow B. How Does Migration Background Affect  
350 COVID-19 Vaccination Intentions? A Complex Relationship Between General Attitudes,  
351 Religiosity, Acculturation and Fears of Infection. *Frontiers in Public Health*. 2022;10.
- 352 18. Khaled SM, Petcu C, Bader L, Amro I, Al-Hamadi AMH, Al Assi M, et al. Prevalence and  
353 potential determinants of COVID-19 vaccine hesitancy and resistance in Qatar: results from a  
354 nationally representative survey of Qatari nationals and migrants between December 2020 and  
355 January 2021. *Vaccines*. 2021;9(5):471.
- 356 19. Ogunbajo A, Ojikutu BO. Acceptability of COVID-19 vaccines among Black immigrants  
357 living in the United States. *Vaccine: X*. 2022;12:100196.
- 358 20. Reagu S, Jones RM, Alabdulla M. COVID-19 Vaccine Hesitancy and Personality Traits;  
359 Results from a Large National Cross-Sectional Survey in Qatar. *Vaccines*. 2023;11(1):189.
- 360 21. Zhang M, Gurung A, Anglewicz P, Subedi P, Payton C, Ali A, et al. Acceptance of COVID-  
361 19 vaccine among refugees in the United States. *Public Health Reports*. 2021;136(6):774-81.
- 362 22. Allen K, Lambert SB, Yuen A, Pourmarzi D. Factors associated with COVID-19 booster  
363 vaccine willingness among migrants from the Eastern Mediterranean living in Australia: a cross-  
364 sectional study. *BMC Public Health*. 2022;22(1):2205.
- 365 23. Kheil MH, Jain D, Jomaa J, Askar B, Alcodray Y, Wahbi S, et al. COVID-19 vaccine  
366 hesitancy among Arab Americans. *Vaccines*. 2022;10(4):610.
- 367 24. Kitro A, Sirikul W, Piankusol C, Rirermsoonthorn P, Seesen M, Wangsan K, et al.  
368 Acceptance, attitude, and factors affecting the intention to accept COVID-19 vaccine among Thai  
369 people and expatriates living in Thailand. *Vaccine*. 2021;39(52):7554-61.
- 370 25. Liddell BJ, Murphy S, Mau V, Bryant R, O'Donnell M, McMahon T, et al. Factors  
371 associated with COVID-19 vaccine hesitancy amongst refugees in Australia. *European Journal*  
372 *of Psychotraumatology*. 2021;12(1):1997173.
- 373 26. Lin S. COVID-19 pandemic and im/migrants' elevated health concerns in Canada: Vaccine  
374 hesitancy, anticipated stigma, and risk perception of accessing care. *Journal of Immigrant and*  
375 *Minority Health*. 2022;24(4):896-908.
- 376 27. Martínez-Donate AP, Correa-Salazar C, Bakely L, González-Fagoaga JE, Asadi-  
377 Gonzalez A, Lazo M, et al. COVID-19 testing, infection, and vaccination among deported Mexican  
378 migrants: Results from a survey on the Mexico-US border. *Frontiers in Public Health*. 2022;10.
- 379 28. Miner CA, Timothy CG, Percy K, Mashige, Osuagwu UL, Envuladu EA, et al. Acceptance  
380 of COVID-19 vaccine among sub-Saharan Africans (SSA): a comparative study of residents and  
381 diasporan dwellers. *BMC Public Health*. 2023;23(1):191.

- 382 29. Page KR, Genovese E, Franchi M, Cella S, Fiorini G, Tili R, et al. COVID-19 vaccine  
383 hesitancy among undocumented migrants during the early phase of the vaccination campaign: a  
384 multicentric cross-sectional study. *BMJ open*. 2022;12(3):e056591.
- 385 30. Rego RT, Ngugi AK, Sophie Delius AJ, Luchters S, Kolars JC, Irfan FB, et al. COVID-19  
386 vaccine hesitancy among non-refugees and refugees in Kenya. *PLOS Global Public Health*.  
387 2022;2(8):e0000917.
- 388 31. Sudhinaraset M, Nwankwo E, Choi HY. Immigration enforcement exposures and COVID-  
389 19 vaccine intentions among undocumented immigrants in California. *Preventive Medicine*  
390 *Reports*. 2022;27:101808.
- 391 32. Teng Y, Hanibuchi T, Nakaya T. Does the integration of migrants in the host society raise  
392 COVID-19 vaccine acceptance? Evidence from a nationwide survey in Japan. *Journal of*  
393 *immigrant and minority health*. 2023;25(2):255-65.
- 394 33. Hnuploy K, Sornlorm K, Soe TK, Khammaneechan P, Rakchart N, Jongjit W, et al. COVID-  
395 19 Vaccine Acceptance and Its Determinants among Myanmar Migrant Workers in Southern  
396 Thailand. *International Journal of Environmental Research and Public Health*.  
397 2022;19(20):13420.
- 398 34. Acharya SR, Moon DH, Shin YC. Assessing attitude toward COVID-19 vaccination in  
399 South Korea. *Frontiers in Psychology*. 2021;12:694151.
- 400 35. West H, Lawton A, Hossain S, Mustafa AG, Razzaque A, Kuhn R. COVID-19 vaccine  
401 hesitancy among temporary foreign workers from Bangladesh. *Health Systems & Reform*.  
402 2021;7(1):e1991550.
- 403 36. Lajunen T, Wróbel B. Acculturation, trust to health care system, and attitudes to COVID-  
404 19 vaccination: A comparative study between Polish immigrants in Norway, Polish in Poland, and  
405 Norwegians in Norway. *Current Research in Ecological and Social Psychology*. 2022;3:100047.
- 406 37. Salibi N, Abdulrahim S, El Haddad M, Bassil S, El Khoury Z, Ghattas H, et al. COVID-19  
407 vaccine acceptance in older Syrian refugees: Preliminary findings from an ongoing study.  
408 *Preventive medicine reports*. 2021;24:101606.
- 409 38. Talafha QM, Al-Haidose A, AlSamman AY, Abdallah SA, Istaiteyeh R, Ibrahim WN, et al.  
410 COVID-19 Vaccine Acceptance among Vulnerable Groups: Syrian Refugees in Jordan. *Vaccines*.  
411 2022;10(10):1634.
- 412 39. Führer A, Pacolli L, Yilmaz-Aslan Y, Brzoska P. COVID-19 Vaccine Acceptance and Its  
413 Determinants among Migrants in Germany—Results of a Cross-Sectional Study. *Vaccines*.  
414 2022;10(8):1350.
- 415 40. Shaw J, Anderson KB, Fabi RE, Thompson CA, Harris M, Aljabbarin N, et al. COVID-19  
416 vaccination intention and behavior in a large, diverse, US refugee population. *Vaccine*.  
417 2022;40(9):1231-7.
- 418 41. Walker AN, Zhang T, Peng X-Q, Ge J-J, Gu H, You H. Vaccine acceptance and its  
419 influencing factors: an online cross-sectional study among international college students studying  
420 in China. *Vaccines*. 2021;9(6):585.
- 421 42. Shearn C, Krockow EM. Reasons for COVID-19 vaccine hesitancy in ethnic minority  
422 groups: A systematic review and thematic synthesis of initial attitudes in qualitative research.  
423 *SSM-Qualitative Research in Health*. 2022:100210.
- 424 43. Alimoradi Z, Sallam M, Jafari E, Potenza MN, Pakpour AH. Prevalence of COVID-19  
425 vaccine acceptance among migrant and refugee groups: A systematic review and meta-analysis.  
426 *Vaccine: X*. 2023:100308.
- 427 44. Crawshaw AF, Farah Y, Deal A, Rustage K, Hayward SE, Carter J, et al. Defining the  
428 determinants of vaccine uptake and undervaccination in migrant populations in Europe to improve  
429 routine and COVID-19 vaccine uptake: a systematic review. *The Lancet Infectious Diseases*.  
430 2022.

- 431 45. Goldman RD, Yan TD, Seiler M, Cotanda CP, Brown JC, Klein EJ, et al. Caregiver  
432 willingness to vaccinate their children against COVID-19: Cross sectional survey. *Vaccine*.  
433 2020;38(48):7668-73.
- 434 46. Schuster L, Gurrieri L, Dootson P. Emotions of burden, intensive mothering and COVID-  
435 19 vaccine hesitancy. *Critical Public Health*. 2023;33(2):218-29.
- 436 47. Alam A. Vaccinating women against COVID in world's largest refugee camp. *Nature*.  
437 2022;603(7902):578-.
- 438 48. Allen JD, Priebe Rocha L, Rose R, Hoch A, Porteny T, Fernandes A, et al. Intention to  
439 obtain a COVID-19 vaccine among Brazilian immigrant women in the US. *Plos one*.  
440 2022;17(9):e0274912.
- 441 49. Corbie-Smith G. Vaccine hesitancy is a scapegoat for structural racism. *JAMA Health*  
442 *Forum*. 2021; 2 (3): e210434. 2021.
- 443 50. Tankwanchi AS, Jaca A, Ndlambe AM, Zantsi ZP, Bowman B, Garrison MM, et al. Non-  
444 COVID-19 vaccine hesitancy among migrant populations worldwide: a scoping review of the  
445 literature, 2000-2020. *Expert Review of Vaccines*. 2022;21(9):1269-87.
- 446 51. Daniels D, Imdad A, Buscemi-Kimmins T, Vitale D, Rani U, Darabaner E, et al. Vaccine  
447 hesitancy in the refugee, immigrant, and migrant population in the United States: A systematic  
448 review and meta-analysis. *Human Vaccines & Immunotherapeutics*. 2022;18(6):2131168.
- 449 52. Pringle W, Sachal SS, Dhutt GS, Kestler M, Dubé É, Bettinger JA. Public health  
450 community engagement with Asian populations in British Columbia during COVID-19: towards a  
451 culture-centered approach. *Canadian Journal of Public Health*. 2022;113(1):14-23.
- 452 53. Seo H, Liu Y, Ittefaq M, Shayesteh F, Kamanga U, Baines A. International migrants and  
453 coronavirus disease 2019 vaccinations: Social Media, motivated information management, and  
454 vaccination willingness. *Digital Health*. 2022;8:20552076221125972.
- 455 54. Romate J, Rajkumar E, Gopi A, Abraham J, Rages J, Lakshmi R, et al. What Contributes  
456 to COVID-19 Vaccine Hesitancy? A Systematic Review of the Psychological Factors Associated  
457 with COVID-19 Vaccine Hesitancy. *Vaccines*. 2022;10(11):1777.
- 458 55. Alcendor DJ, Matthews-Juarez P, Smoot D, Hildreth JE, Tabatabai M, Wilus D, et al. The  
459 COVID-19 Vaccine and Pregnant Minority Women in the US: Implications for Improving Vaccine  
460 Confidence and Uptake. *Vaccines*. 2022;10(12):2122.
- 461 56. Ghare F, Meckawy R, Moore M, Lomazzi M. Determinants of Acceptance of COVID-19  
462 Vaccination in Healthcare and Public Health Professionals: A Review. *Vaccines*. 2023;11(2):311.
- 463 57. Whitehead HS, French CE, Caldwell DM, Letley L, Mounier-Jack S. A systematic review  
464 of communication interventions for countering vaccine misinformation. *Vaccine*. 2023.
- 465 58. Lin S, Jing Z, Howard N, Chantler T, Cheng J, Zhang S, et al. Associations of Elements  
466 of Parental Social Integration with Migrant Children's Vaccination: An Epidemiological Analysis of  
467 National Survey Data in China. *Vaccines*. 2021;9(8):884.
- 468 59. Giannoni M, Franzini L, Masiero G. Migrant integration policies and health inequalities in  
469 Europe. *BMC Public Health*. 2016;16(1):1-14.
- 470 60. Contreras-Pérez ME, Diaz-Martinez J, Langwerden RJ, Hospital MM, Morris SL, Wagner  
471 EF, et al. Preliminary Analysis of COVID-19 Vaccination Factors among Native and Foreign-Born  
472 Hispanic/Latine Adults Residing in South Florida, USA. *International Journal of Environmental*  
473 *Research and Public Health*. 2022;19(20):13225.

474

475 **Appendix 1. Medline search strategy**

476 **Appendix2. Data extraction tool**

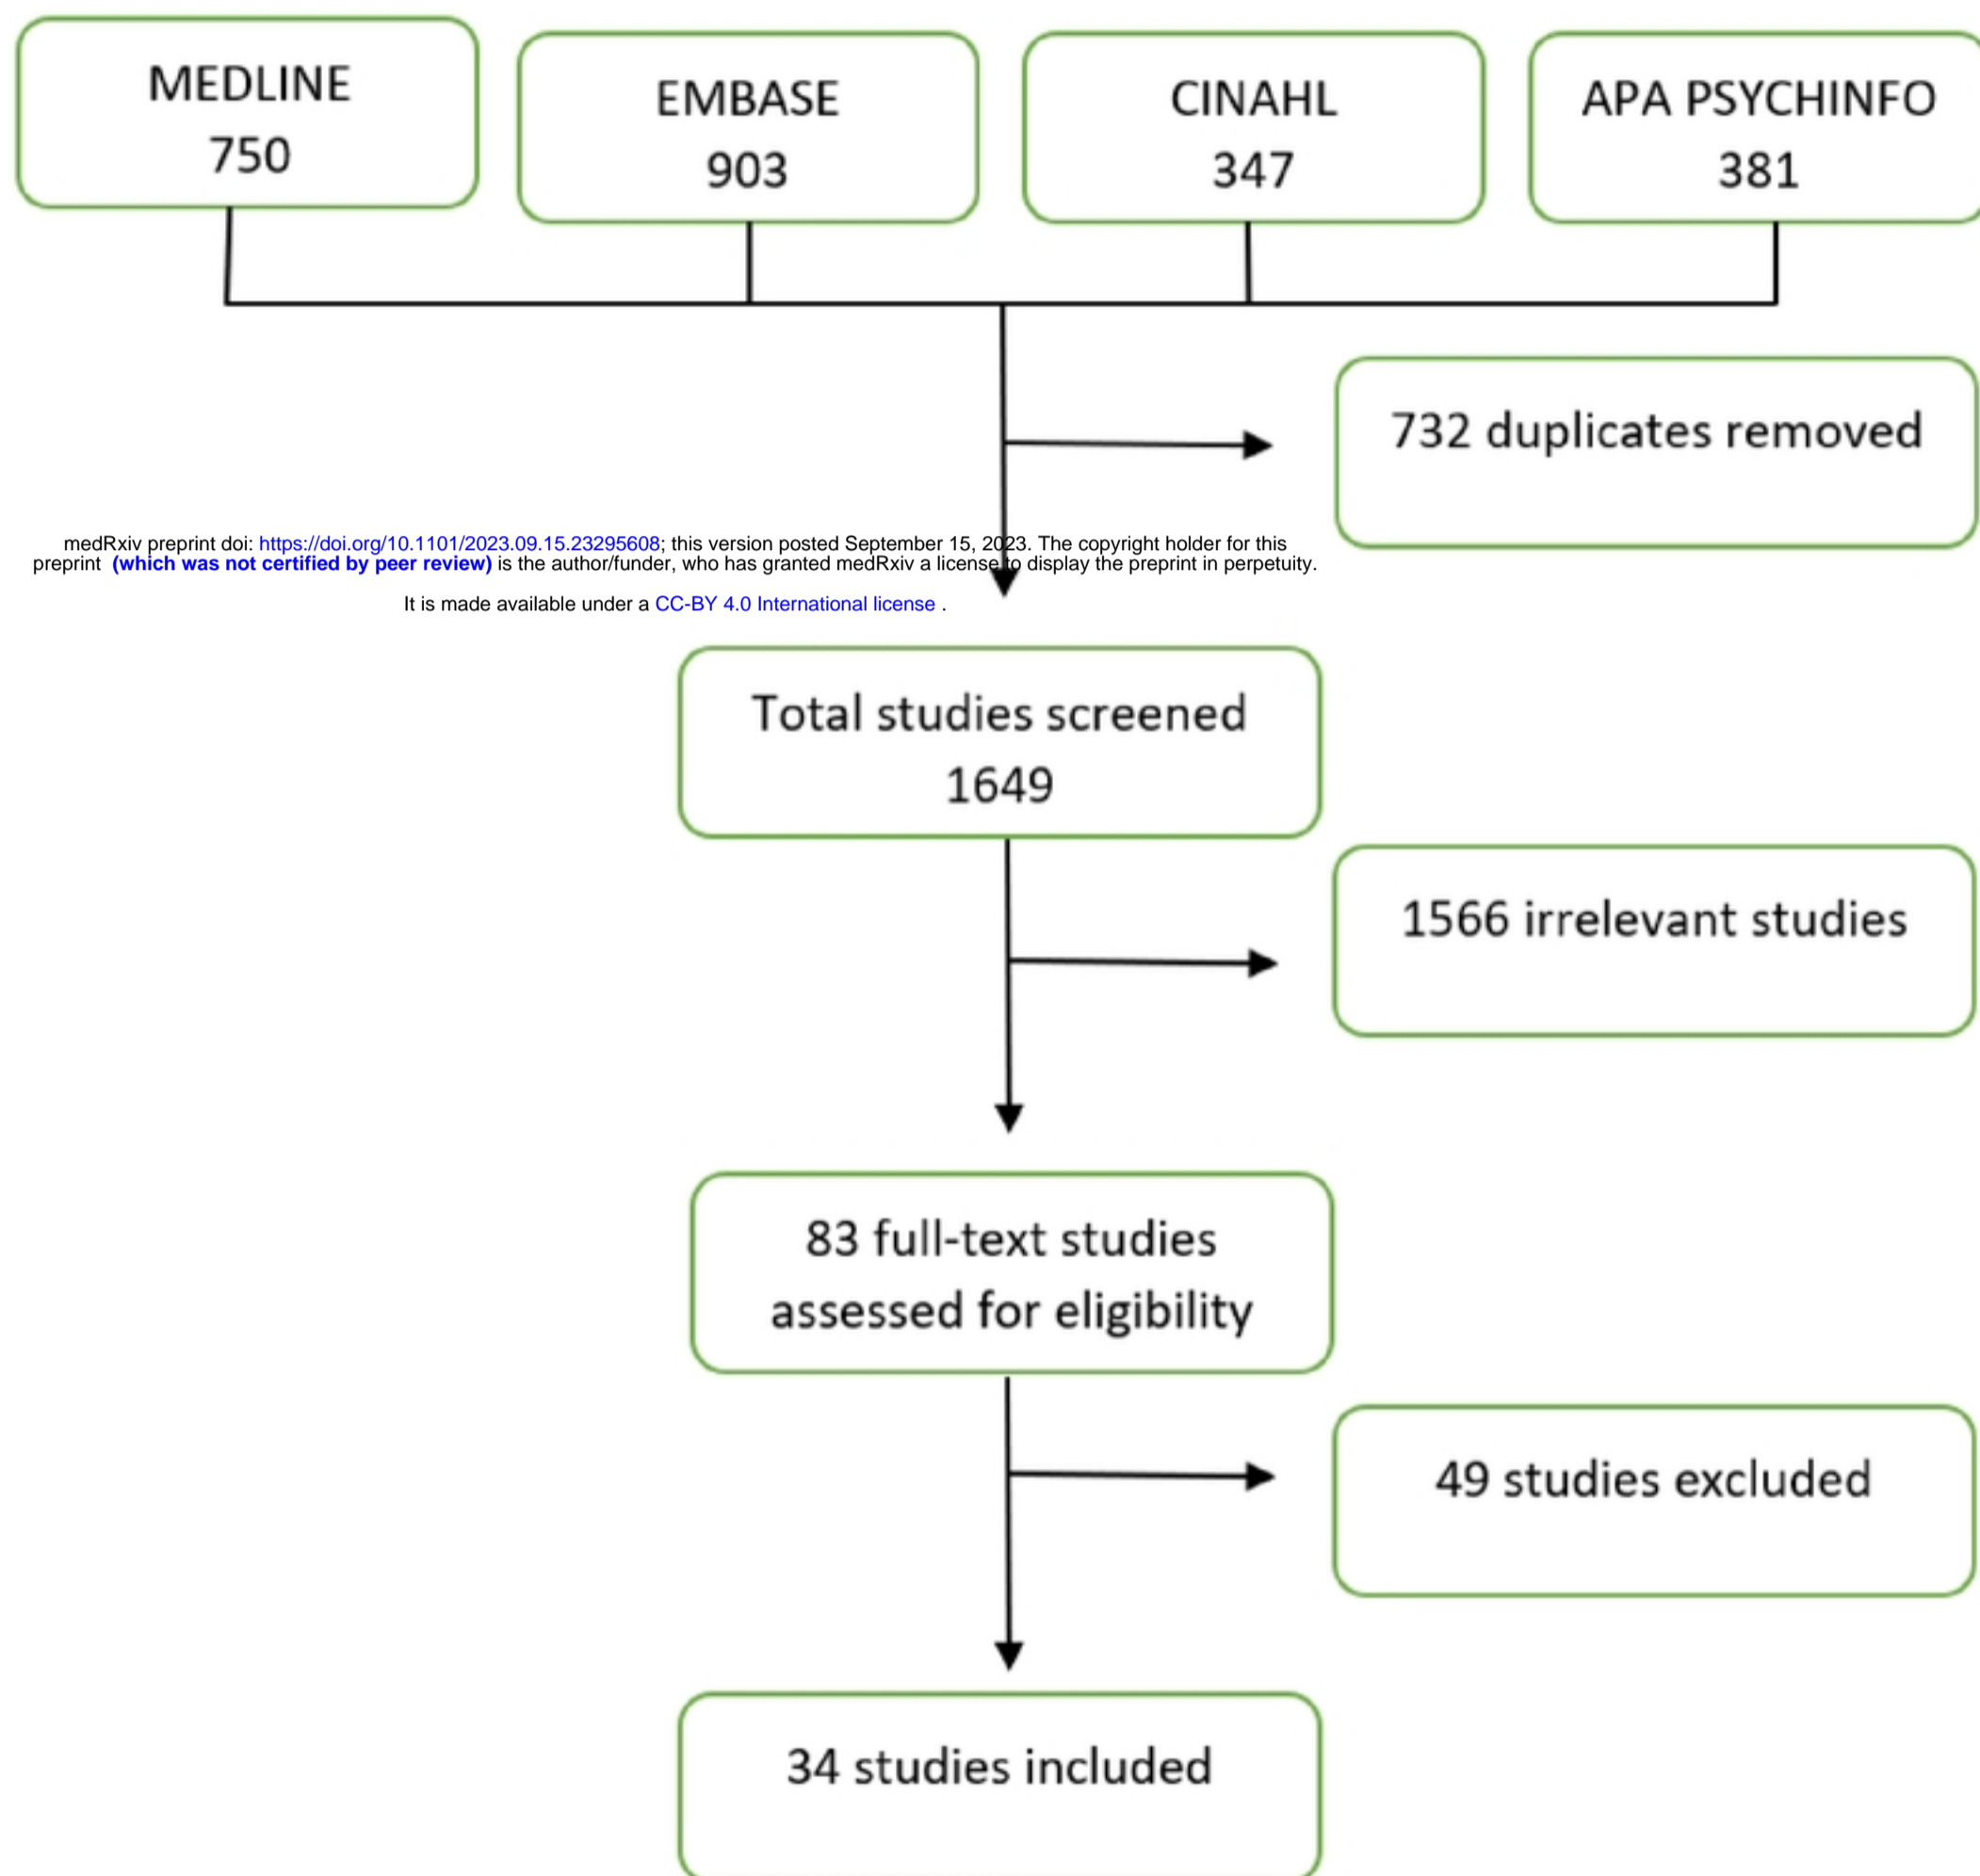

medRxiv preprint doi: <https://doi.org/10.1101/2023.09.15.23295608>; this version posted September 15, 2023. The copyright holder for this preprint (which was not certified by peer review) is the author/funder, who has granted medRxiv a license to display the preprint in perpetuity.

It is made available under a [CC-BY 4.0 International license](https://creativecommons.org/licenses/by/4.0/).

Figure
